1 **Title:**

2 **Genotyping of structural variation using PacBio high-fidelity**  
3 **sequencing**

4

5 **Authors:**

6 Zhiliang Zhang<sup>1, 2, #</sup>, Jijin Zhang<sup>1, 2, #</sup>, Lipeng Kang<sup>1, 2</sup>, Xuebing Qiu<sup>1, 2</sup>, Beirui Niu<sup>1</sup>, Aoyue  
7 Bi<sup>1, 2</sup>, Xuebo Zhao<sup>1, 2</sup>, Daxing Xu<sup>1, 2</sup>, Jing Wang<sup>1</sup>, Changbin Yin<sup>1</sup>, Xiangdong Fu<sup>1, 2</sup>, Fei  
8 Lu<sup>1, 2, 3\*</sup>

9

10 **Affiliations:**

11 <sup>1</sup>State Key Laboratory of Plant Cell and Chromosome Engineering, Institute of Genetics and  
12 Developmental Biology, Innovative Academy of Seed Design, Chinese Academy of Sciences,  
13 Beijing, China.

14 <sup>2</sup>University of Chinese Academy of Sciences, Beijing, China.

15 <sup>3</sup>CAS-JIC Centre of Excellence for Plant and Microbial Science (CEPAMS), Institute of  
16 Genetics and Developmental Biology, Chinese Academy of Sciences, Beijing, China.

17 <sup>#</sup>These authors contributed equally to this work.

18 <sup>\*</sup>Corresponding authors: [flu@genetics.ac.cn](mailto:flu@genetics.ac.cn) (F.L.)

## 19 **Abstract**

### 20 Background

21 Structural variations (SVs) pervade the genome and contribute substantially to the phenotypic  
22 diversity of species. However, most SVs were ineffectively assayed because of the  
23 complexity of plant genomes and the limitations of sequencing technologies. Recent  
24 advancement of third-generation sequencing technologies, particularly the PacBio high-  
25 fidelity (HiFi) sequencing, which generates both long and highly accurate reads, offers an  
26 unprecedented opportunity to characterize SVs and reveal their functionality. Since HiFi  
27 sequencing is new, it is crucial to evaluate HiFi reads in SV detection before applying the  
28 technology at scale.

### 29 Results

30 We sequenced wheat genomes using HiFi, then conducted a comprehensive evaluation of SV  
31 detection using mainstream long-read aligners and SV callers. The results showed the  
32 accuracy of SV discovery depends more on aligners rather than callers. For aligners, pbmm2  
33 and NGMLR provided the most accurate results while detecting deletion and insertion,  
34 respectively. Likewise, cuteSV and SVIM achieved the best performance across all SV  
35 callers. We demonstrated that the combination of the aligners and callers mentioned above is  
36 optimal for SV detection. Furthermore, we evaluated the impact of sequencing depth on the  
37 accuracy of SV detection. The results showed that low-coverage HiFi sequencing is capable  
38 of generating high-quality SV genotyping.

### 39 Conclusions

40 This study provides a robust benchmark of SV discovery with HiFi reads, showing the  
41 remarkable potential of long-read sequencing to investigate structural variations in plant  
42 genomes. The high accuracy SV discovery from low-coverage HiFi sequencing indicates that  
43 skim HiFi sequencing is an ideal approach to study structural variations at the population  
44 level.

45

### 46 **Keywords:**

47 Structural variation (SV), SV detection, PacBio, High-fidelity (HiFi) reads

## 48 **Background**

49 Structural variations (SVs) and single nucleotide polymorphisms (SNPs) are two ends of the  
50 genetic variation spectrum. On the contrary to the simplicity of SNPs, SVs exhibit a much  
51 higher level of complexity—insertion, deletion, duplication, inversion, and translocation,  
52 varying in size from ~50 bp<sup>1</sup> to hundreds of megabases (Mb), constitute a highly diverse set  
53 of SVs in the genome<sup>234</sup>. While SVs being considered as a major source of casual variation in  
54 crop traits, such as flowering time in maize (e.g., *Vgt1*<sup>5</sup>, *ZmCCT*<sup>67</sup>), the grain yield in rice  
55 (e.g., *GW5*<sup>8</sup> and *GL7*<sup>9</sup>), the solid-stemmed architecture in wheat (e.g., *TdDof*<sup>10</sup>), and the  
56 smoky volatile locus in tomato (e.g., *NSGT1*<sup>11</sup> and *NSGT2*<sup>12</sup>), the detection and genotyping  
57 of SVs remains to be one of the greatest challenges in genomic studies<sup>13</sup>.

58         Aside from the structural complexity of the genome, technological limitations are also  
59 restricting SV detection and genotyping<sup>1415</sup>. Even though the cost of Next-generation high-  
60 throughput sequencing (HTS) remains relatively low, it is constrained by the short read  
61 length, causing the insufficient power to detect the large SVs. Long-read sequencing, such as  
62 PacBio CLR and Oxford Nanopore, has the advantage of scanning large SV, but their high  
63 base error rate (~ 8 - 20%) put forward higher demands for long reads aligner and SV caller,  
64 which restricting strongly the wide application owing to imprecise breakpoint and inaccurate  
65 SV sequence<sup>1617</sup>. Encouragingly, the PacBio CCS method generates high accurate long HiFi  
66 reads (>10 Kb) and seems to strike the perfect balance between reads accuracy and length,  
67 further improving SV detection<sup>18</sup>. Meanwhile, the corresponding algorithms, such as aligners  
68 (pbmm2, NGMLR<sup>19</sup>, or Minimap2<sup>20</sup>) and callers (pbsv, cuteSV<sup>21</sup>, SVIM<sup>22</sup>, and Sniffles<sup>19</sup>),  
69 were developed for long-scale SV identification, though almost all the SV algorithm were  
70 generally designed for the diploid human genome. The progress of sequencing technology  
71 will bring the great reform in SV detection, to which we say: 1) how to establish robust  
72 benchmark tools for SV discovery based on HiFi reads; 2) how to achieve the higher  
73 performance to deeply mine the SV in the plant genome; 3) how to optimize parameter on SV  
74 calling to deal with the relatively high cost at the population level.

75         Here, we provide the first workflow with general applicability to evaluate SV  
76 detection using current long-read aligners and SV callers based on HiFi reads. The analysis  
77 establishes not only a robust guideline for SV detection with HiFi reads in the plant genome,  
78 but also the parameter optimization for low-coverage data mining. Predictably, this study will  
79 facilitate the large-scale application of PacBio HiFi sequencing technology at the population  
80 level.



## 82 **Results**

### 83 **Schematic workflow of evaluating SV detection algorithm**

84 We evaluated the performance of existing long-read-based SV callers and alignment  
85 programs against the ground truth set identified by integrating multiple genomic data in the  
86 following approach (Fig. 1). In step1 (“SV calling”), SV sets were obtained using pbsv,  
87 cuteSV, SVIM, and Sniffles after pbmm2, NGMLR, or Minimap2 alignment. Because pbsv  
88 cannot recognize the Minimap2 alignment format, we finally identified a total of 11 SV sets  
89 with combinations of the aligners and SV callers. In step2 (“Truth set construction”), due to  
90 the lack of available ground truth SV set in the wheat genome, several samples were deep re-  
91 sequenced. For each candidate SV, the discordant alignment features and depth features were  
92 characterized by the methods of read depth (RD), read pair (RP), and split read (SR) from  
93 short-read sequencing data (see the “Methods” section for details). Therefore, the truth SV set  
94 was formed based on the data integration of multiple sequence technologies, which is close to  
95 comprehensively characterizing SVs, although it was devoid of undiscovered SVs. In step3  
96 (“Precision-recall comparison”), we were able to test the performance of 11 SV sets by  
97 estimating precision, recall, and F-measure using the truth SV set. Overall, we provide a  
98 general workflow for comprehensive evaluation of long-read aligners and SV callers, hoping  
99 to build a robust benchmark for SV detection.

100

### 101 **Sequence-resolved candidate sets of structural variation (SV)**

102 To facilitate the study of genome-wide identification of SVs in different wheat accessions,  
103 we tested three ploidy levels (AABBDD, AABB, DD genome) from *Triticum/Aegilops* using  
104 PacBio Circular Consensus Sequencing (CCS) mode, generating highly accurate HiFi reads  
105 with an average length of 13.0 kb, 17.2 kb, 12.9 kb, respectively (Additional file 2: Tables S1,  
106 Additional file 1: Figure S1). By applying our previously designed pipeline for cross-ploidy  
107 genetic variation discovery, we identified 11 sequence-resolved candidate SV sets per sample  
108 from the combination of the aligners and SV callers<sup>2324</sup>. In general, all SV callers were  
109 similar with respect to the number of SVs after NGMLR or pbmm2 alignment, but the SVs  
110 count by Minimap2 is higher than the other two aligners (Fig. 2a, Additional file 1: Figure  
111 S2a, Additional file 2: Tables S2). As expected, the SV size distribution showed decreasing  
112 frequency with increasing length and was deeply affected both by aligner and caller (Fig. 2b).  
113 For deletion, more smaller (50-100bp) events could be detected by aligner Minimap2. Also,  
114 NGMLR could detect the little large events(~300bp) for insertion.

115 The occupancy of computing resources, an important factor considered by users  
116 including run time and average memory usage, was then examined using 20 threads in the  
117 hexaploid genome (Additional file 1: Figure S2, Additional file 2: Tables S3). For run time,  
118 aligner pbmm2 and Minimap2 generally processed the same datasets (~30Gb) with 5-7 times  
119 less runtime relative to NGMLR (380.4 & 562.8 mins vs. 2691 mins), and callers pbsv took a  
120 long time for SV detection than the other three callers. For average memory usage, aligners  
121 occupied relatively high memory (32-50 G). In addition, callers cuteSV, Sniffles, and SVIM  
122 used a similar memory ( $\leq 6$  G), and pbsv required a little more memory (~16 G). Overall,  
123 the impact on computing resources was mainly concentrated in the aligner, not the SV caller.  
124

### 125 **The base-level SV truth set**

126 Unlike human, little SV study is relatively available in the wheat genome. To evaluate the  
127 performance of the SV detection algorithm, the SV truth set was first constructed using data  
128 integration of multiple sequence technologies<sup>25</sup>. By deep re-sequencing (14~25 X) of these  
129 samples, we had the ability to validate the results of each 11 SV sets through utilizing the  
130 discordant alignment and depth features (Additional file 2: Tables S1). For deletion, we  
131 developed an efficient pipeline, Bin-deletion, by calculating the depth features for which  
132 deletions were discovered. Due to a large number gap in the wheat genome, we corrected  
133 depth and chose adjustDepth = 0 for the deletion truth set (see the “Methods” section for  
134 details). Given the success of genotyping tools of structural variations (SVs)<sup>26,27,28</sup>, we use  
135 paragraph<sup>26</sup>, an accurate genotyper for short-read sequencing data, to further validate the  
136 insertion dataset that had been mined by long-read HIFI data.

137 In addition, many packages for merging structural variants (SVs) among multi-VCF  
138 files have been released in recent years<sup>29,30</sup>. It is worth noting that previous work rarely  
139 incorporated the effect of a maximum allowed merging distance, which usually used 500 or  
140 1000 bp distance, resulting in a decline in the number of SVs and imprecise breakpoint  
141 position<sup>31,32,33</sup>. Moreover, there are obvious distinctions among callers for the same candidate  
142 insertion. To avoid these issues and obtain a more accurate truth set, each truth set of the  
143 corresponding candidate SV set was independently constructed, respectively.

144 For deletion, all deletion truth sets obtained by the method of Bin-deletion were  
145 merged to form the deletion truth set. For insertion, due to the difference in callers, we then  
146 tested the position distance for the two adjacent records, which had a 2-bp difference in size  
147 for insertion sequence after merging multiple insertion truth files identified by paragraph. 2-  
148 bp distance in the left and right breakpoints, which was able to combine 95.83 % of the

149 nearest insertion data within a 2-bp length difference, was permitted for merging or  
150 comparing any insertion files. Combined with the above results, the base-level SV truth set  
151 was formed and considered as a real dataset for further analysis (Additional file 1: Figure S3,  
152 Additional file 2: Tables S4).

153

### 154 **The impact of aligners and callers on SV detection**

155 No previous study to discuss the impact of aligner and caller on the accuracy of the SV set.  
156 To investigate this, we first constructed a total of 63 SV sets based on aligner, including 30  
157 two-callers, 18 three-callers, and 4 four-callers SV sets obtained by the integration of caller  
158 pbsv, cuteSV, SVIM, and Sniffles after pbmm2, NGMLR and Minimap2 alignment,  
159 respectively, as well as 11 single-caller SV sets each from the caller and aligner combination  
160 of pairs. Furthermore, 37 SV sets based on the same caller, composed of 11 single-aligner, 20  
161 two-aligners and 6 three-aligners, were obtained from the combination (intersection or union)  
162 of multiple SV sets.

163 According to the aligners, 63 SV sets, either deletion or insertion, were clearly  
164 divided into three groups (Fig. 3). There was an obvious contrast in precision among aligner-  
165 based methods, but not the 37 caller-based SV sets. Robust analysis of variance for 11 single-  
166 caller SV sets in different ploidy levels indicated that the result was a significant difference  
167 across aligner and caller (Table 1). The variance explained by the aligner was greater than the  
168 variance explained by the caller, especially the precision of SV sets. The results showed that  
169 both the precision and recall varied depending on aligner rather than caller, so 63 SV sets  
170 based on aligner should be recommended for in-depth analysis.

### 171 **Overall performance of 63 SV detection algorithm**

172 Establishing a standard method for SV detection posed big challenges for users in algorithm  
173 selection based on HiFi read. Recent research showed that a combination (intersection or  
174 union) of multiple SV callers could contribute to obtaining confidence or sensitivity results  
175 based on Illumina short-read<sup>3435</sup> and Oxford Nanopore long-read data<sup>17</sup>. Considering the  
176 advantage of highly accurate long HiFi reads, can this combination approach of SV callers  
177 improve the precision/recall? We further integrated a total of 63 SV sets based on aligner to  
178 evaluate the effect of single/combining SV call sets against the base-level SV truth set in  
179 hexaploidy (AABBDD) genome.

180 Minimap2 worked less well in terms of precision than the other aligners, either  
181 deletion or insertion, and aligner NGMLR or pbmm2 were emphatically discussed for further  
182 analysis (Fig. 4, Additional file 2: Tables S5-7).

183 1) Single SV detection algorithm:

184 For deletion, the highest F-measure was obtained using cuteSV, SVIM or pbsv after  
185 pbmm2 alignment, and Sniffles was less powerful resulting in a lower precision (Fig.  
186 4a, Additional file 1: Figure S4a S5a). For insertion, callers cuteSV or SVIM also  
187 achieved good performance, but NGMLR was more accurate than aligner pbmm2,  
188 which was a great deal of difference compared to deletion (Fig. 4b, Additional file 1:  
189 Figure S4d S5d).

190 2) Combining SV detection algorithm:

191 As expected, the recall values of high-confidence (intersection) sets gradually  
192 decreased with the increase of combined SV sets (Fig. 4, Additional file 1: Figure S6a  
193 S7d, Additional file 2: Tables S6). However, given the similar precision values for  
194 deletion, insertion showed a general trend with the apparent addition in the values of  
195 precision compared with single caller SV set in three ploidy levels. On the contrary,  
196 high-sensitivity (union) sets, generated using two or more SV sets, could be capable  
197 of increasing recall with a bit of change of precision for both deletion and insertion  
198 (Fig. 4, Additional file 1: Figure S7a S7d, Additional file 2: Tables S7).

199 In summary, benchmark tools for SV detection could be recommended that caller  
200 cuteSV or SVIM after aligner pbmm2 (for deletion) or NGMLR (for insertion) achieved the  
201 optimum performance for the HiFi data in hexaploidy genome. High-confidence results could  
202 be obtained by combining multiple SV callers for insertion on precision, and could not be  
203 significantly improved in deletion calling. However, high-sensitivity results, both deletion or  
204 insertion identification, were significantly increased on recall values (Additional file 1:  
205 Figure S7a S7d, Additional file 2: Tables S7).

206

### 207 **Benchmark tools should be independent of ploidy level**

208 Almost all the SV algorithms are designed to detect large-scale genomic variation for the  
209 diploid human genome<sup>2</sup>. However, the nature of the plant genome, distinct differences in  
210 ploidy variation<sup>36</sup>, present challenges to deeply mine the character of SV variation. To test  
211 the effect of ploidy levels on SV calling, we then analyzed the tetraploid (AABB) and diploid  
212 (DD) genome applying the above method (Additional file 1: Figure S8 S9). Like the  
213 hexaploid genome, precision-recall curves presented clear information that caller cuteSV or



214 SVIM exhibited higher performances in calling SV and aligner pbmm2 or NGMLR achieved  
215 the best performances for the deletion or insertion data, respectively. Furthermore, more  
216 confident or sensitive results could be obtained by a combination of overlapping SV callers.  
217 These results demonstrated that the performance, including precision and recall, was entirely  
218 irrelevant to the ploidy level (Additional file 1: Figure S10).

219

### 220 **Impact of sequencing depth on precision**

221 PacBio CCS method produces highly accurate (~99.8%) and long (>10 kb) reads, which  
222 greatly enhancing the ability of SV detection<sup>18</sup>. However, this approach is difficult to scale up  
223 for SV genomics studies at the population level, due to its relatively high cost and lower  
224 output of HiFi data, especially in the large and hexaploidy wheat genome. To lower these  
225 limitations and obtain confidence results, it is particular importance to evaluate the relation  
226 between sequencing depth and precision.

227         Given the relative higher depth in the diploid (DD) sample, the number of SVs  
228 discovery and corresponding precision were calculated with caller cuteSV or SVIM after  
229 aligner pbmm2 (for deletion) or NGMLR (for insertion) (Fig. 5a-b, d-e, Additional file 2:  
230 Tables S8). The count of SVs, both deletion and insertion, increased rapidly with increasing  
231 depth and gradually tended to be saturated (Fig. 5a, d). Unexpectedly, the precision had  
232 almost no variability with the sequencing depth increasing to ~6.6X (Fig. 5b, e). The  
233 extremely slight decrease of the precision had confirmed that using deeper HiFi data could  
234 lead to many false positives in keeping with PacBio CLR and Oxford Nanopore long-reads<sup>19</sup>.  
235 Also, it might be caused by the more large-scale SV (>10kb), over the length of a long-read,  
236 which were obtained with the sequencing depth increasing (Additional file 1: Figure S11-12).  
237 These results demonstrated convincingly that deep sequencing can increase recall clearly, but  
238 cannot improve precision effectively.

239

### 240 **Parameter optimization**

241 The minimum number of supporting reads for a candidate variation is a crucial parameter to  
242 call or filter SVs. A recent study revealed that at least 25 long-reads are required to achieve >  
243 80% precision, suggesting that high coverage is essential for SV calling using Oxford  
244 Nanopore data<sup>17</sup>. Based on the highly accurate sequence technology, HiFi reads may obtain  
245 more reliable results using less supporting long-reads in theory. Hence, we further evaluated  
246 the influence of the number of supporting reads on calling accuracy.

247           The precision values varied from 0.67 to 0.90 on deletion and 0.58 to 0.82 on  
248 insertion with the supporting reads increasing to 10 (Fig. 5c, f, Additional file 2: Tables S9).  
249 Significantly, only one long-read that supports a candidate SV was required to achieve > 60%  
250 precision. In order to achieve relatively higher accuracy, minimal support reads = 3 should be  
251 recommended for parameter setting with the precision of deletion (> 80%) and insertion (>  
252 70%), revealing the remarkable ability to detect SVs using low-coverage HiFi data.  
253

## 254 Discussion

255 Advances in sequence technology—including, but not limited to, the over 10 kilobases (kb)  
256 length and 99.8% accuracy of long HiFi reads—greatly speed up the process of large-scale  
257 variation study<sup>18</sup>. Correspondingly, new long-reads aligners and SV callers are springing out  
258 constantly. Although recent researches have showed the strong point and shortcoming of the  
259 current tools for less-accurate ONT long-reads in the human genome<sup>1617</sup>, there is no  
260 knowledge of comprehensively evaluation for the performance of SV mainstream algorithms  
261 based on highly accurate long HiFi reads, especially for the large allopolyploid genome in the  
262 plant.

263 In this study, we performed re-sequencing of multiple ploidy genomes using the  
264 PacBio CCS method and designed a generally applicable workflow for comparing the  
265 precision and recall of single or combining SV sets against the base-level SV truth set  
266 utilizing the data integration of multiple sequence technologies. Given the significant  
267 differences in aligner selection on SV calling, F-test showed that aligners could explain the  
268 higher proportions of total variance compared to callers, suggesting that the performance of  
269 SV detection varies depending on the long-read aligners rather than the callers, particularly in  
270 deletion identification and SV accuracy (Fig. 3, Tables 1). It also means that a more effective  
271 aligner is urgently needed to be developed for getting accurate and comprehensive SV data.

272 Based on evaluation results, we found that caller cuteSV or SVIM should be  
273 recommended as benchmark callers, unrelated to SV type or ploidy level (Fig. 4, Additional  
274 file 1: Figure S4, S5-10). However, the selection of aligner obviously differs for SV type  
275 with pbmm2 or NGMLR for deletion and insertion detection, respectively (Fig. 4, Additional  
276 file 1: Figure S4-5). Besides, high confidence result of insertion could be obtained by the  
277 intersection of SV sets, but not in deletion, at the cost of a decline in the number of insertions  
278 (Fig. 4, Additional file 1: Figure S6). And the union of SV sets could dramatically improve  
279 recall values, both deletion and insertion, while its precision share declined slightly (Fig. 4,  
280 Additional file 1: Figure S7). In particular, the more detailed recommendation for users is  
281 listed in Table 2.

282 Another key issue that has to be considered is how to maximize low-coverage data  
283 mining under insuring SV accuracy without adding research cost. De Coster et al. reported  
284 that either at least 25 long-reads or ~ 8X genome coverage was required to achieve > 80%  
285 precision, meaning that the high coverage is essential for SV calling by Oxford Nanopore  
286 PromethION sequencing<sup>17</sup>. It is so rejuvenating that the PacBio CCS method can obtain the

287 same—or better—results from only 3 long HiFi reads than ONT data. Even minimal support  
288 read = 1 also enables SVs to achieve the precision of deletion (~ 76%) and insertion (~ 65%),  
289 revealing the outstanding ability of detecting SVs using low-coverage HiFi data (Fig. 5c, f).  
290 In addition, the increase of genome coverage does not appear to affect improvement in  
291 precision from 0.33X to 6.60X, which provides strong evidence that deep sequencing can  
292 increase recall clearly, but cannot improve precision effectively (Fig. 5b, e). Aiming at the  
293 research demand, not the big data, we anticipate that these findings will be used widely to  
294 accelerate genomics studies of the PacBio CCS method at the population level.

295

296

## 297 **Conclusion**

298 No previous study has comprehensively evaluated the performance of the major SV aligner  
299 and caller using the PacBio high fidelity (HiFi) reads. This study provided a schematic  
300 workflow with wide availability for evaluating the SV detection algorithms in terms of  
301 precision and recall. Our results revealed that the performance of SV detection varied  
302 depending on the long-read aligners rather than the SV callers. Caller cuteSV or SVIM after  
303 pbmm2 (for deletion) or NGMLR (for insertion) alignment should be recommended as  
304 benchmarking SV software, unrelated ploidy level. Furthermore, we characterized the impact  
305 on the performance of genome coverage and parameter setting for low-coverage data mining.  
306 Predictably, this study will facilitate widespread applications of PacBio HiFi sequencing  
307 technology for population-scale studies.

308

## 309 **Methods**

### 310 **Sample preparation and PacBio circular consensus sequencing (CCS)**

311 To facilitate the study of genome-wide identification of SVs in different wheat accessions,  
312 we collected three ploidy levels (AABBDD, AABB from *Triticum*; DD genome from  
313 *Aegilops*). All three samples were planted in growth chambers. The tender leaves were  
314 divided into two equal parts, one half for next-generation sequencing (NGS) on Illumina  
315 NovaSeq 6000 system and the other half for Circular Consensus Sequencing (CCS) on  
316 PacBio Sequel II system.

### 317 **Data processing**

318 *Reads alignment.* By applying our previously designed pipeline for cross-ploidy genetic  
319 variation discovery, the NGS/CCS data were mapped to the corresponding wheat reference  
320 genome (IWGSC RefSeq v1.0) using short-reads aligner (BWA-MEM) and long-reads  
321 aligner (pbmm2, NGMLR<sup>19</sup>, or Minimap2<sup>20</sup>) with default parameters, respectively. The bam  
322 files were filtered (unique mapping with mapping quality  $\geq 20$ ) and sorted using samtools  
323 (version 1.9).

324 *SV calling pipeline.* SV calling, using pbsv (version 2.3.0), cuteSV (version 1.0.9)<sup>21</sup>, SVIM  
325 (version 1.4.2)<sup>22</sup>, and Sniffles (version 1.0.11)<sup>19</sup>, was performed following the recommended  
326 parameters with minor modifications. For most SV callers, the minimum number of reads  
327 was setting 10 as the default. However, the highly accurate HiFi reads may obtain more  
328 reliable results using less supporting long-reads in theory. On this basis, minimal support read  
329 = 1 was set for SV calling.

330 *Candidate SV sets filter.* SVs for 11 candidate SV sets presenting the following conditions  
331 were retained: (1) SV length  $\geq 50$  bp; (2) minimal support long-read  $\geq 1$ ; (3) SVs passing  
332 the quality filters suggested by callers (flag PASS).

### 333 **The base-level SV truth set construction**

334 *Bin-deletion method for deletion true set.* For every given deletion from the above 11  
335 candidate SV sets, read depth was first calculated by NGS data with mosdepth (version 0.2.6)  
336 and the discordant alignment features were collected using samtools (FLAG 1294) and the  
337 script “extractSplitReads\_BwaMem” developed by lumpy-sv. Due to large amounts of “N” in  
338 the wheat reference genome, we further calculated the “adjustDepth” as follows:

$$adjustDepth = \frac{Depth * SVsLength}{SVsLength - GapLength}$$

339 We further investigated the distribution of “adjustDepth”, following Poisson  
340 distribution. To obtain the more accurate true set, we selected “adjustDepth = 0” as golden

341 standard. Combining with the discordant alignment features, every given deletion was  
342 evaluated to determine if they are true. All true deletions, a higher resolution for breakpoints,  
343 obtained by the above method were merged and formed the base-level deletion truth set.

344 *Paragraph genotyping method for insertion true set.* Given the success of genotyping tools of  
345 large-scale variation, Paragraph, an accurate genotyper for short-read sequencing data, was  
346 used to validate the insertion dataset that had been mined by 11 candidate SV sets. Previous  
347 work usually used the maximum allowed merging distance of 500 or 1000 bp distance,  
348 resulting in a decline in the number of SVs and imprecise breakpoint position. Considering  
349 the record difference of position for the same insertion among SV callers, 2-bp distance in the  
350 left and right breakpoints was chose as the maximum allowed merging distance. All true  
351 insertions, obtained by Paragraph, were merge using SURVIVOR<sup>29</sup> and formed the base-  
352 level insertion truth set.

### 353 **Evaluation of the SV detection accuracy**

354 *Evaluation of single SV call sets.* To evaluate the performance of combinations of the aligners  
355 and SV callers, the performance for 11 candidate SV sets was assessed against the base-level  
356 SV truth set using surpyvor (version 0.6.0)<sup>17</sup>, a powerful tool for the calculation of precision-  
357 recall-F-measure metrics.

358 *Evaluation of combining SV call sets.* High-confidence or sensitivity SV call sets could be  
359 obtained by intersection or union of multiple SV callers. We first constructed the combining  
360 SV call sets and then analyzed the performance for each set, using SURVIVOR and surpyvor,  
361 respectively.

362 *Statistical analysis for SV detection accuracy.*

363 Precision (Pr) and recall (Rc) were calculated as follows:

$$Pr = \frac{TPs}{TPs + FPs}$$

$$Rc = \frac{TPs}{TPs + FNs}$$

364 The F-measure (F) is the harmonic mean of precision and recall, which was calculated as  
365 follows:

$$F = \frac{2 * Pr * Rc}{Pr + Rc}$$

366

### 367 **Analysis of sequencing depth on precision**

368 To study the relationship between the sequence coverage and precision, we randomly down-  
369 sampled the sequencing data of the DD sample with 20 gradients from 5% to 100% using

370 Samtools (version 1.8). Following the above method, each coverage sample was evaluated  
371 against the base-level SV truth set after reads alignment, SV calling and filter.  
372

373 **Declarations**

374 **Ethics approval and consent to participate**

375 Not applicable.

376

377 **Consent for publication**

378 Not applicable.

379

380 **Availability of data and materials**

381 The raw sequence data were deposited in the Genome Sequence Archive (GSA)  
382 (<https://ngdc.cncb.ac.cn/gsa/>) under accession numbers CRA004631.

383

384 **Competing interests**

385 The authors declare that they have no competing interests.

386

387 **Funding**

388 This research was supported by the Strategic Priority Research Program of the Chinese  
389 Academy of Sciences (XDA24020201 and XDA24040102) and the National Natural Science  
390 Foundation of China (31921005 and 31970631).

391

392 **Authors' contributions**

393 FL designed and supervised the research. ZZ, JZ and FL developed the general schematic  
394 workflow and performed data analysis. LK, XQ, BN and XF helped with data analysis. AB,  
395 XZ, DX, JW and CY collected plant materials. ZZ, JZ and FL wrote the manuscript. All  
396 authors discussed the results and commented on the manuscript.

397

398

399 **Acknowledgments**

400 We thank all members (Hua Zhang, Jun Xu, Yafei Guo, Ming Zhang, Xiaohan Yang, Song  
401 Xu, Xinyue Song, Jiayu Dong and Liping Jiang) for their valuable comments in Fei Lu's  
402 group, Institute of Genetics and Developmental Biology, Chinese Academy of Sciences.

403



404 **Authors' information**

405 State Key Laboratory of Plant Cell and Chromosome Engineering, Institute of Genetics and  
406 Developmental Biology, Innovative Academy of Seed Design, Chinese Academy of Sciences,  
407 Beijing, China.

408 Zhiliang Zhang, Jijin Zhang, Lipeng Kang, Xuebing Qiu, Beirui Niu, Aoyue Bi, Xuebo Zhao,  
409 Daxing Xu, Jing Wang, Changbin Yin, Xiangdong Fu, Fei Lu

410

411 University of Chinese Academy of Sciences, Beijing, China.

412 Zhiliang Zhang, Jijin Zhang, Lipeng Kang, Xuebing Qiu, Aoyue Bi, Xuebo Zhao, Daxing Xu,  
413 Xiangdong Fu, Fei Lu

414

415 CAS-JIC Centre of Excellence for Plant and Microbial Science (CEPAMS), Institute of  
416 Genetics and Developmental Biology, Chinese Academy of Sciences, Beijing, China.

417 Fei Lu

418

419 Corresponding author

420 Correspondence to Fei Lu.

421

422 **Publisher's Note**

423 Springer Nature remains neutral with regard to jurisdictional claims in  
424 published maps and institutional affiliations.

425

## 426 Reference

- 427 1. Alkan, C., Coe, B. P. & Eichler, E. E. Genome structural variation discovery and  
428 genotyping. *Nat Rev Genet* **12**, 363–376 (2011).
- 429 2. De Coster, W., Weissensteiner, M. H. & Sedlazeck, F. J. Towards population-scale  
430 long-read sequencing. *Nat. Rev. Genet.* **22**, 572–587 (2021).
- 431 3. Ho, S. S., Urban, A. E. & Mills, R. E. Structural variation in the sequencing era. *Nat.*  
432 *Rev. Genet.* **21**, 171–189 (2020).
- 433 4. Abel, H. J. *et al.* Mapping and characterization of structural variation in 17,795 human  
434 genomes. *Nature* **583**, 83–89 (2020).
- 435 5. Castelletti, S., Tuberosa, R., Pindo, M. & Salvi, S. A MITE transposon insertion is  
436 associated with differential methylation at the maize flowering time QTL Vgt1. *G3*  
437 *(Bethesda)*. **4**, 805–12 (2014).
- 438 6. Yang, Q. *et al.* CACTA-like transposable element in ZmCCT attenuated photoperiod  
439 sensitivity and accelerated the postdomestication spread of maize. *Proc. Natl. Acad.*  
440 *Sci.* **110**, 16969–16974 (2013).
- 441 7. Huang, C. *et al.* ZmCCT9 enhances maize adaptation to higher latitudes. *Proc. Natl.*  
442 *Acad. Sci.* **115**, E334–E341 (2018).
- 443 8. Liu, J. *et al.* GW5 acts in the brassinosteroid signalling pathway to regulate grain  
444 width and weight in rice. *Nat. Plants* 2017 35 **3**, 1–7 (2017).
- 445 9. Wang, Y. *et al.* Copy number variation at the GL7 locus contributes to grain size  
446 diversity in rice. *Nat. Genet.* 2015 478 **47**, 944–948 (2015).
- 447 10. Nilsen, K. T. *et al.* Copy number variation of TdDof controls solid-stemmed  
448 architecture in wheat. *Proc. Natl. Acad. Sci.* **117**, 28708–28718 (2020).
- 449 11. Tikunov, Y. M. *et al.* NON-SMOKY GLYCOSYLTRANSFERASE1 Prevents the  
450 Release of Smoky Aroma from Tomato Fruit. *Plant Cell* **25**, 3067 (2013).
- 451 12. Alonge, M. *et al.* Major Impacts of Widespread Structural Variation on Gene  
452 Expression and Crop Improvement in Tomato. *Cell* **182**, 145-161.e23 (2020).
- 453 13. Chaisson, M. J. P. *et al.* Multi-platform discovery of haplotype-resolved structural  
454 variation in human genomes. *Nat. Commun.* 2019 101 **10**, 1–16 (2019).
- 455 14. W Coster, C. B. Newest methods for detecting structural variations. *Trends Biotechnol.*  
456 **37**, 973–982 (2019).
- 457 15. Mahmoud, M. *et al.* Structural variant calling: the long and the short of it. *Genome*  
458 *Biol.* 2019 201 **20**, 1–14 (2019).

- 459 16. Zhou, A., Lin, T. & Xing, J. Evaluating nanopore sequencing data processing pipelines  
460 for structural variation identification. *Genome Biol.* **20**, 1–13 (2019).
- 461 17. Coster, W. De *et al.* Structural variants identified by Oxford Nanopore PromethION  
462 sequencing of the human genome. *Genome Res.* **29**, gr.244939.118 (2019).
- 463 18. Wenger, A. M. *et al.* Accurate circular consensus long-read sequencing improves  
464 variant detection and assembly of a human genome. *Nat. Biotechnol.* **2019 3710** **37**,  
465 1155–1162 (2019).
- 466 19. Sedlazeck, F. J. *et al.* Accurate detection of complex structural variations using single  
467 molecule sequencing. *Nat. Methods* **15**, 461 (2018).
- 468 20. Li, H. Minimap2: pairwise alignment for nucleotide sequences. *Bioinformatics* **34**,  
469 3094–3100 (2018).
- 470 21. Cheng, H., Concepcion, G. T., Feng, X., Zhang, H. & Li, H. Haplotype-resolved de  
471 novo assembly with phased assembly graphs. (2020). doi:10.1038/s41592-020-01056-  
472 5
- 473 22. D Heller, M. V. SVIM: structural variant identification using mapped long reads.  
474 *Bioinformatics* **35**, 2907–2915 (2019).
- 475 23. Zhou, Y. *et al.* Triticum population sequencing provides insights into wheat adaptation.  
476 *Nat. Genet.* **52**, 1412–1422 (2020).
- 477 24. Appels, R. *et al.* Shifting the limits in wheat research and breeding using a fully  
478 annotated reference genome. *Science* **361**, eaar7191 (2018).
- 479 25. Zook, J. M. *et al.* A robust benchmark for detection of germline large deletions and  
480 insertions. *Nat. Biotechnol.* **2020 3811** **38**, 1347–1355 (2020).
- 481 26. S Chen, P. K. E. D. R. S. R. P. F. S. M. K. D. B. M. S. F. S. M. E. Paragraph: A graph-  
482 based structural variant genotyper for short-read sequence data. *bioRxiv* **24**, 635011  
483 (2019).
- 484 27. Hickey, G. *et al.* Genotyping structural variants in pangenome graphs using the vg  
485 toolkit. *Genome Biol.* **2020 211** **21**, 1–17 (2020).
- 486 28. Eggertsson, H. P. *et al.* GraphTyper2 enables population-scale genotyping of structural  
487 variation using pangenome graphs. *Nat. Commun.* **2019 101** **10**, 1–8 (2019).
- 488 29. Jeffares, D. C. *et al.* Transient structural variations have strong effects on quantitative  
489 traits and reproductive isolation in fission yeast. *Nat. Commun.* **2017 81** **8**, 1–11 (2017).
- 490 30. Larson, D. E. *et al.* svtools: population-scale analysis of structural variation.  
491 *Bioinformatics* **35**, 4782–4787 (2019).
- 492 31. Zhou, Y. *et al.* The population genetics of structural variants in grapevine

- 493 domestication. *Nat. Plants* **5**, 965–979 (2019).
- 494 32. Weissensteiner, M. H. *et al.* Discovery and population genomics of structural variation  
495 in a songbird genus. *Nat. Commun.* 2020 111 **11**, 1–11 (2020).
- 496 33. Aganezov, S. *et al.* Comprehensive analysis of structural variants in breast cancer  
497 genomes using single-molecule sequencing. *Genome Res.* **30**, 1258–1273 (2020).
- 498 34. Cameron, D. L., Di Stefano, L. & Papenfuss, A. T. Comprehensive evaluation and  
499 characterisation of short read general-purpose structural variant calling software. *Nat.*  
500 *Commun.* 2019 101 **10**, 1–11 (2019).
- 501 35. Kosugi, S. *et al.* Comprehensive evaluation of structural variation detection algorithms  
502 for whole genome sequencing. *Genome Biol.* **20**, 8–11 (2019).
- 503 36. Madlung, A. Polyploidy and its effect on evolutionary success: Old questions revisited  
504 with new tools. *Heredity* **110**, 99–104 (2013).
- 505

506 **Table 1 F-test between aligners and callers**

507

| Sample | SV type | Measure   | Aligner variance | F-value    | P-value  |          | Caller variance | F-value  | P-value  |          |  |
|--------|---------|-----------|------------------|------------|----------|----------|-----------------|----------|----------|----------|--|
| AABBDD | DEL     | Precision | 0.18562          | 503.27100  | 1.72E-06 | ***      | 0.00095         | 1.70900  | 2.80E-01 |          |  |
|        | INS     |           | 0.88730          | 3148.91000 | 1.77E-08 | ***      | 0.00670         | 15.89000 | 5.46E-03 | **       |  |
| AABB   | DEL     |           | 0.10049          | 281.61000  | 7.26E-06 | ***      | 0.00452         | 8.44000  | 2.11E-02 | *        |  |
|        | INS     |           | 0.56240          | 248.18100  | 9.93E-06 | ***      | 0.00450         | 1.33400  | 3.62E-01 |          |  |
| DD     | DEL     |           | 0.14677          | 15.83600   | 6.86E-03 | **       | 0.04245         | 3.05400  | 1.30E-01 |          |  |
|        | INS     |           | 0.21123          | 104.80500  | 8.29E-05 | ***      | 0.00057         | 0.18800  | 9.00E-01 |          |  |
| AABBDD | DEL     |           | 0.42720          | 97.08000   | 9.99E-05 | ***      | 0.01060         | 1.60900  | 2.99E-01 |          |  |
|        | INS     |           | 0.41340          | 70.41200   | 2.18E-04 | ***      | 0.02000         | 2.27500  | 1.97E-01 |          |  |
| AABB   | DEL     |           | Recall           | 0.29788    | 60.42200 | 3.15E-04 | ***             | 0.00926  | 1.25200  | 3.84E-01 |  |
|        | INS     |           |                  | 0.20767    | 29.91800 | 1.65E-03 | **              | 0.01029  | 0.98800  | 4.69E-01 |  |
| DD     | DEL     | 0.15625   |                  | 73.45700   | 1.97E-04 | ***      | 0.01068         | 3.34700  | 1.13E-01 |          |  |
|        | INS     | 0.18227   |                  | 27.39800   | 2.02E-03 | **       | 0.00785         | 0.78700  | 5.51E-01 |          |  |

508 \*\*\*\*\*: p < 0.001    \*\*\*: p < 0.01    \*\*: p < 0.05    \*: p < 0.1

509

510 **Table 2 Benchmark tools for SV detection in the allopolyploid genome**

| Ploidy                   | PAV type  | Result           | Benchmark tools |                                          | Performance    |                |
|--------------------------|-----------|------------------|-----------------|------------------------------------------|----------------|----------------|
|                          |           |                  | aligner         | caller                                   | precision      | recall         |
| AABBDD<br>(2n = 6X = 42) | Deletion  | Single caller    | pbmm2           | cuteSV / SVIM / pbsv                     | 0.92/0.92/0.93 | 0.47/0.48/0.46 |
|                          |           | High-confidence  |                 | cuteSV $\boxtimes$ SVIM $\boxtimes$ pbsv | 0.93           | 0.44           |
|                          |           | High-sensitivity |                 | cuteSV U SVIM U pbsv                     | 0.92           | 0.48           |
|                          | Insertion | Single caller    | NGMLR           | cuteSV / SVIM                            | 0.87/0.87      | 0.75/0.76      |
|                          |           | High-confidence  |                 | cuteSV $\boxtimes$ SVIM                  | 0.87           | 0.74           |
|                          |           | High-sensitivity |                 | cuteSV U SVIM                            | 0.87           | 0.77           |
| AABB<br>(2n = 4X = 28)   | Deletion  | Single caller    | pbmm2           | cuteSV / SVIM / pbsv                     | 0.85/0.85/0.86 | 0.49/0.50/0.48 |
|                          |           | High-confidence  |                 | cuteSV $\boxtimes$ SVIM $\boxtimes$ pbsv | 0.87           | 0.47           |
|                          |           | High-sensitivity |                 | cuteSV U SVIM U pbsv                     | 0.85           | 0.51           |
|                          | Insertion | Single caller    | NGMLR           | cuteSV / SVIM                            | 0.80/0.79      | 0.70/0.71      |
|                          |           | High-confidence  |                 | cuteSV $\boxtimes$ SVIM                  | 0.80           | 0.68           |
|                          |           | High-sensitivity |                 | cuteSV U SVIM                            | 0.80           | 0.72           |
| DD<br>(2n = 2X = 14)     | Deletion  | Single caller    | pbmm2           | cuteSV / SVIM / pbsv                     | 0.84/0.85/0.86 | 0.68/0.70/0.67 |
|                          |           | High-confidence  |                 | cuteSV $\boxtimes$ SVIM $\boxtimes$ pbsv | 0.88           | 0.64           |
|                          |           | High-sensitivity |                 | cuteSV U SVIM U pbsv                     | 0.84           | 0.70           |
|                          | Insertion | Single caller    | NGMLR           | cuteSV / SVIM                            | 0.72/0.71      | 0.69/0.70      |
|                          |           | High-confidence  |                 | cuteSV $\boxtimes$ SVIM                  | 0.72           | 0.67           |
|                          |           | High-sensitivity |                 | cuteSV U SVIM                            | 0.72           | 0.71           |

511

## 512 **Figure legends**

513 **Fig. 1** Schematic workflow of the comprehensive evaluation of long-read aligners and SV  
514 callers. **Step 1 SV calling** SV sets were obtained from the 4 callers and 3 aligners  
515 combination of pairs based on PacBio HiFi reads. **Step 2 Truth set construction** Truth SV  
516 set was formed based on the data integration of multiple sequence technologies (see the  
517 “Methods”). **Step 3 Performance evaluation** Comprehensive evaluation of aligners and  
518 callers for Pacbio HiFi long-reads.

519

520 **Fig. 2** Summary of the sequence-resolved candidate SV sets. The number (**a**) and size  
521 distribution (**b**) of each SV type, deletion and insertion, from 11 sequence-resolved candidate  
522 SV sets.

523

524 **Fig. 3** The impact of aligners and callers on SV detection. **a** (deletion) **and c** (insertion)  
525 Precision-recall plot of 63 SV sets obtained by a combination of multiple callers based on the  
526 same long-read aligner. **b** (deletion) **and d** (insertion) Precision-recall plot of 37 SV sets  
527 obtained by a combination of multiple aligners based on the same SV caller.

528

529 **Fig. 4** Comprehensive evaluation of 63 SV sets in hexaploid (AABBDD) genome. **a** (deletion)  
530 **and b** (insertion) Precision-recall graph of single/combining SV call sets against the base-  
531 level SV truth set. Aligners are represented by symbols, and multiple set sources are  
532 represented by colors as specified in the legend.

533

534 **Fig. 5** The impact of the sequencing depth and supporting reads variation on SV detection.  
535 Precision (**a and d**) and recall (**b and e**) showed the influence of the genome depth after  
536 down-sampling from 0.33X to 6.60X. **c and f** The effect of supporting reads on SV accuracy.  
537 Caller pbsv after pbmm2 (for deletion) or NGMLR (for insertion) alignment was tagged with  
538 blue, caller cuteSV/SIM with red/brown.

539

### Step1 PAV calling

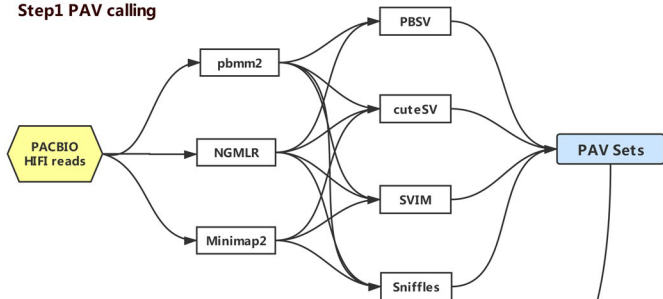

### Step2 Truth set construction

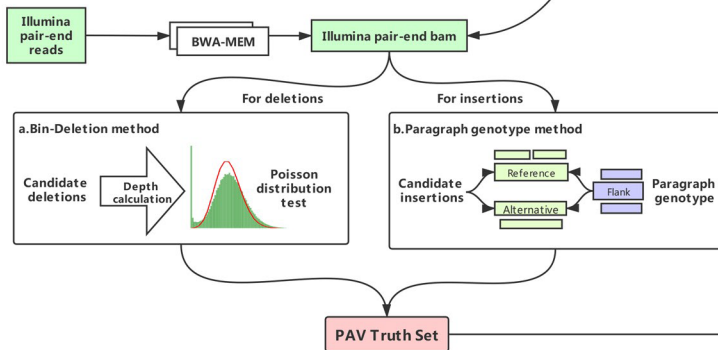

### Step3 Performance evaluation

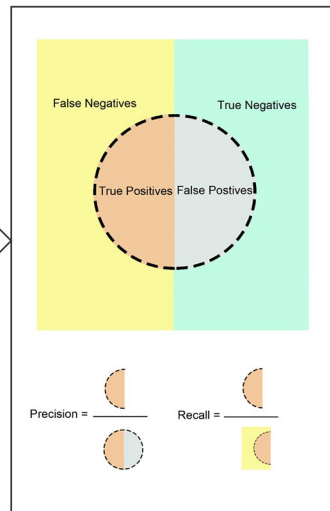



## Deletion

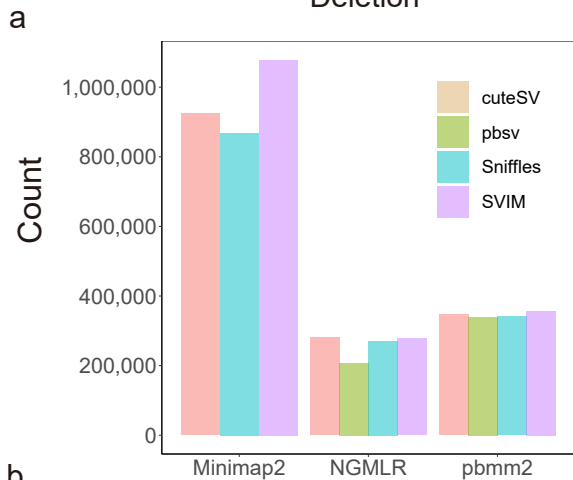

## Insertion

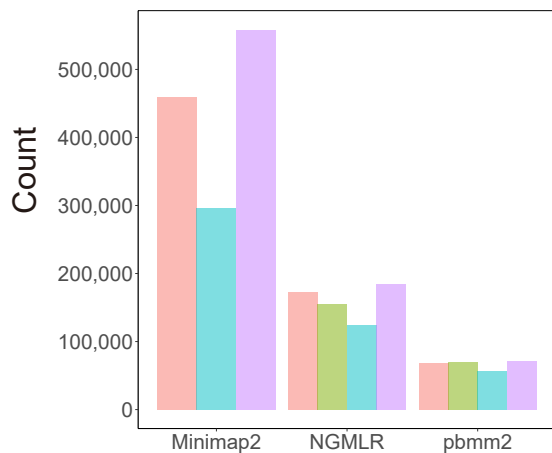

**b**

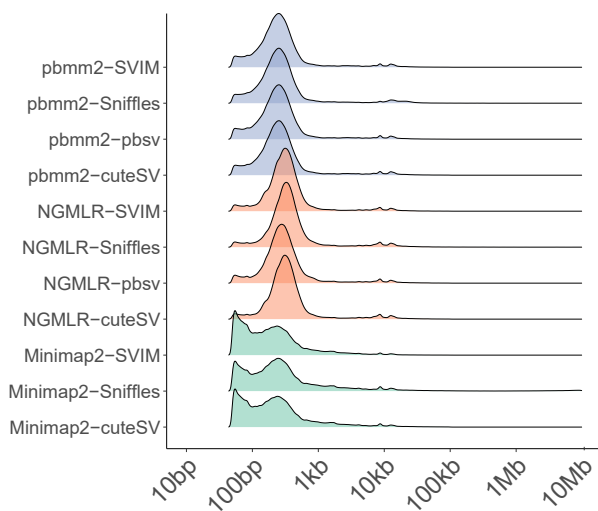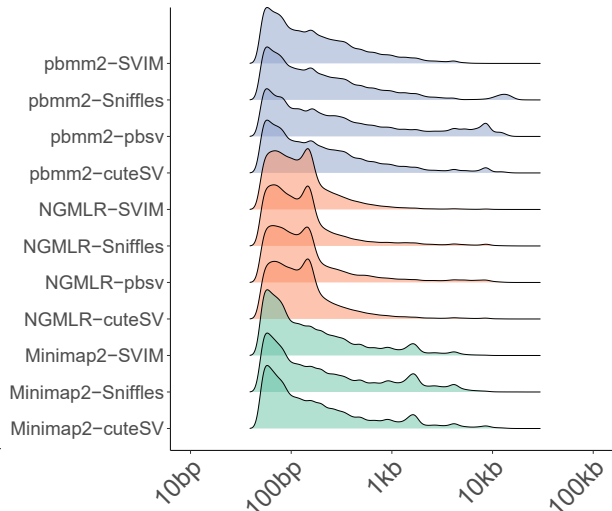

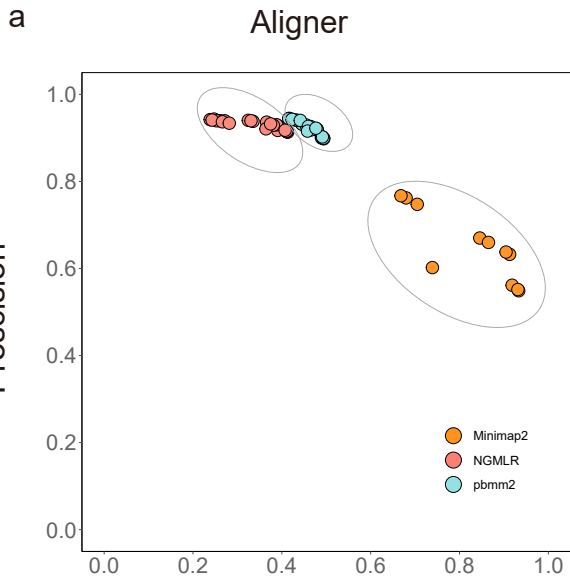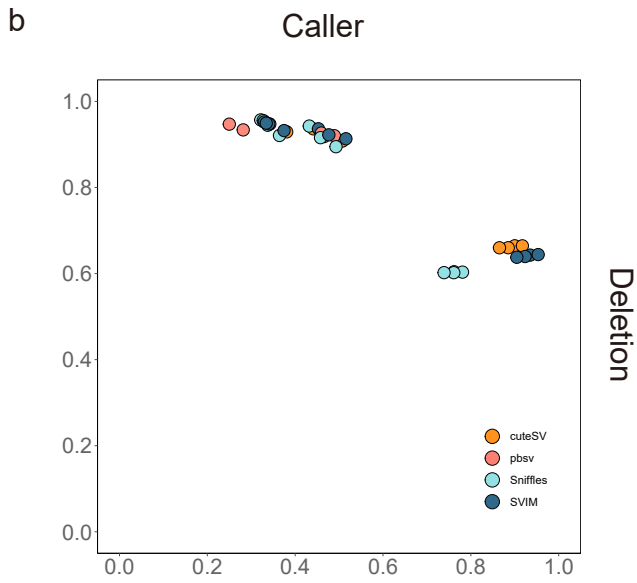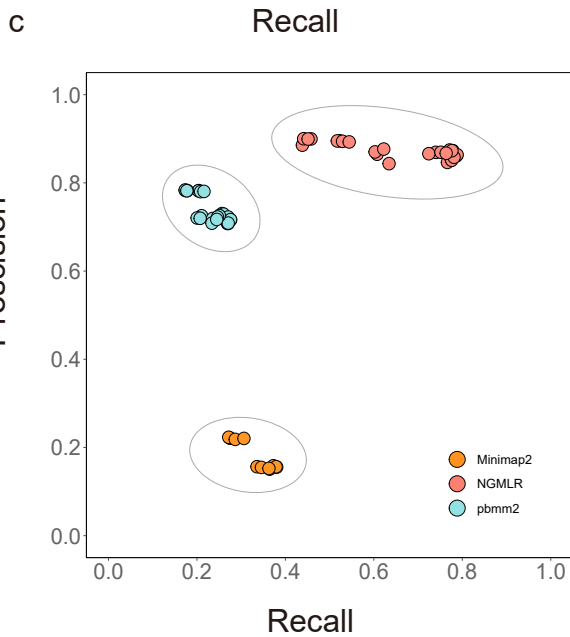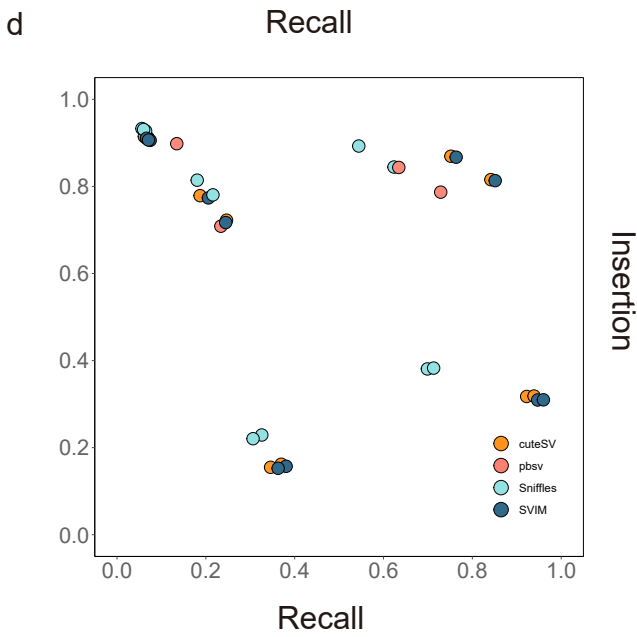

### a AABDD-Deletion

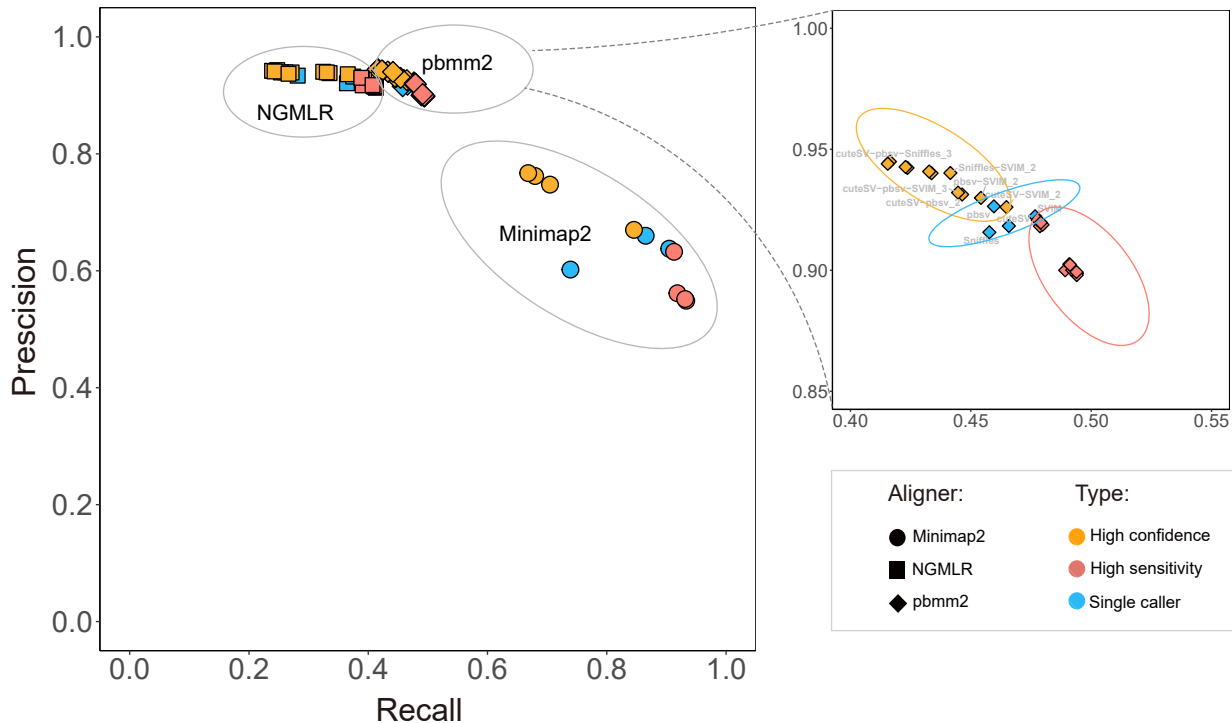

### b AABDD-Insertion

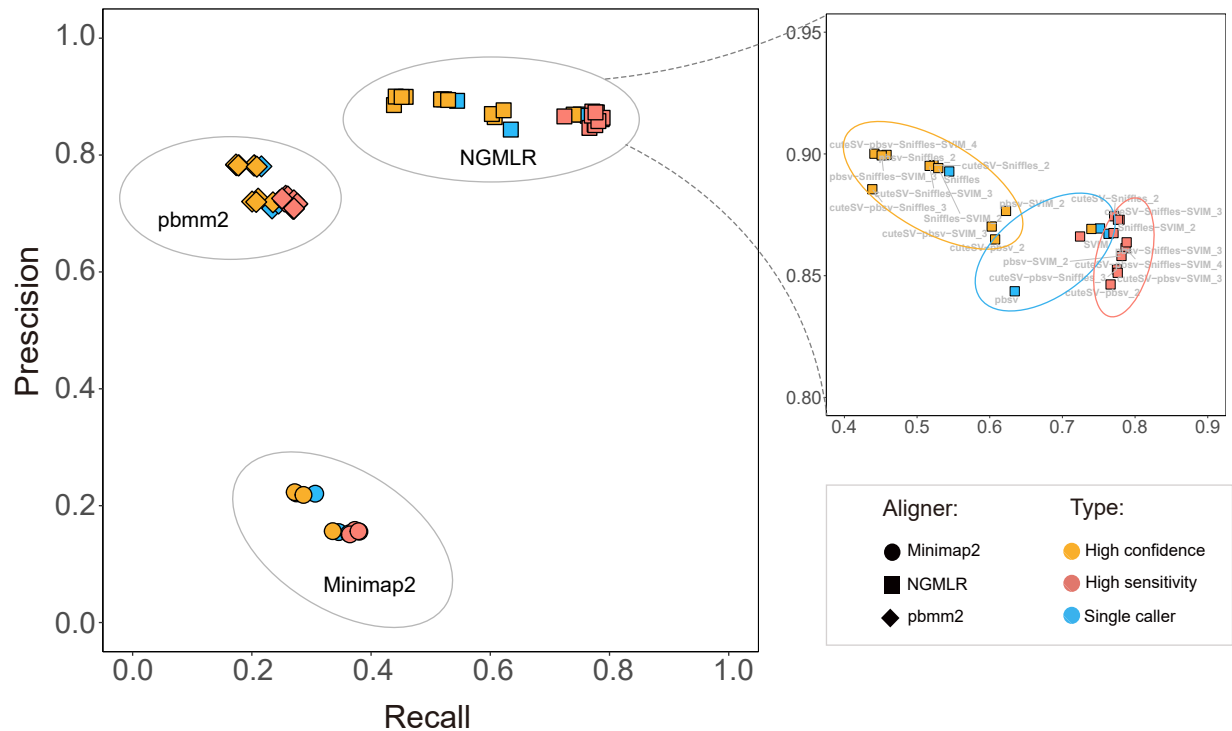

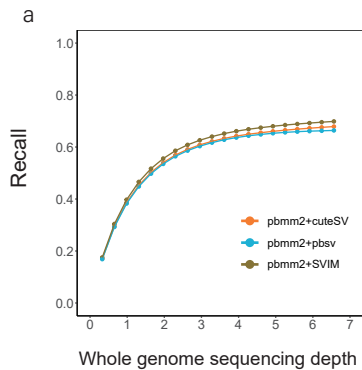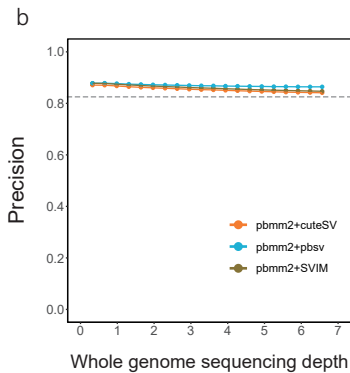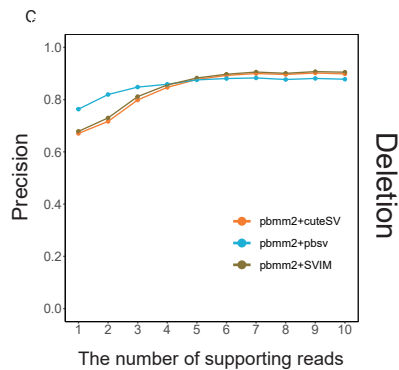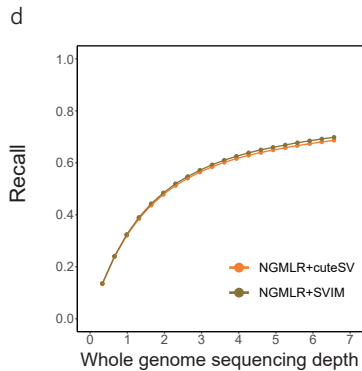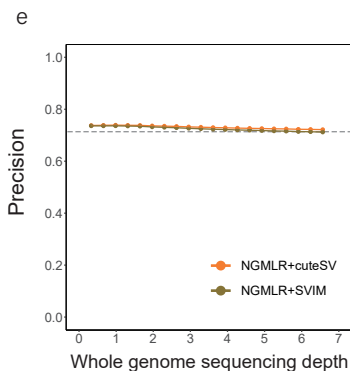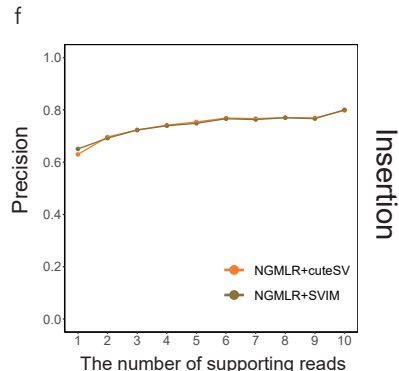

Source: https://www.biorxiv.org/content/10.1101/2021.10.28.466362v1.full.pdf
